# Supplementary material
Source: Springer Nature journal article supplement (https://www.springermedizin.de/resource/supplementary/13063_2013_2023_MOESM7_ESM.pdf/9621172)

**a**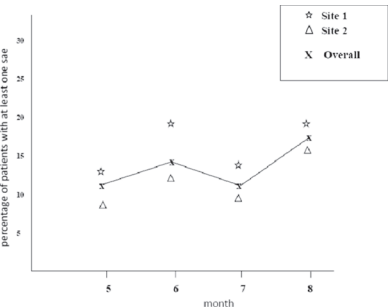**b**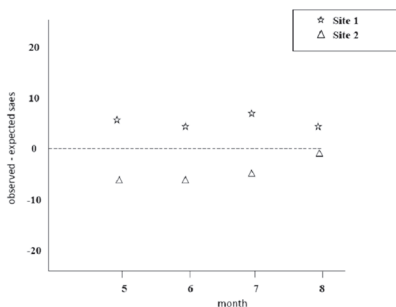**c**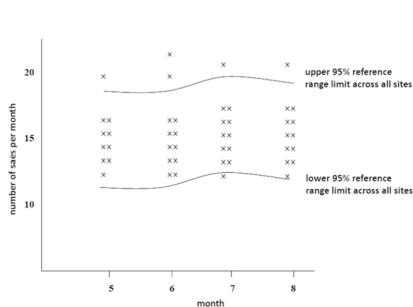

Supplement: MOESM7 [file 9621172]
